# Supplementary material for: Two machine learning methods identify a metastasis-related prognostic model that predicts overall survival in medulloblastoma patients
Source: publisher site journal article supplement (doi:10.18632/aging.103923), 2020-11-05
Supplement: Supplementary file [file aging-v12i21-103923-supplementary-material-SD1.pdf]

## SUPPLEMENTARY TABLES

Supplementary Table 1. The multivariate Cox regression coefficients of the genes in the 47-mRNA metastasis-related prognostic model.

| Gene name | Coefficient |
|-----------|-------------|
| AK7       | 0.179608    |
| ARHGEF40  | -0.62077    |
| ARL1      | 0.670076    |
| ARSG      | 0.31238     |
| BACH2     | 0.387613    |
| C9orf153  | 0.759155    |
| CAMKK1    | -0.42176    |
| CCDC125   | -0.50066    |
| COPS7B    | 0.417233    |
| CPB2      | 0.490751    |
| EIF2B3    | 0.244405    |
| FABP4     | 0.084767    |
| FAM81A    | -0.09479    |
| GAGE1     | 0.085492    |
| GPR126    | 0.176501    |
| GSDMC     | -0.03405    |
| GUCY2C    | 0.926616    |
| GYG2      | 0.545351    |
| HIST1H2AE | 0.757313    |
| ICOS      | 0.48971     |
| IDI2      | 0.382761    |
| IL22      | -0.27895    |
| KCNAB3    | -0.17314    |
| MAGEB5    | 0.560332    |
| MDN1      | -0.4732     |
| MEIS2     | 0.233501    |
| NTHL1     | 1.20003     |
| NUP210L   | 0.776257    |
| PAPPA2    | -0.05873    |
| POLE3     | -0.64073    |
| POLN      | 0.177848    |
| POU1F1    | 0.06912     |
| PSORS1C1  | 1.19728     |
| RN7SKP226 | 0.206219    |

|           |          |
|-----------|----------|
| RN7SL187P | -0.62164 |
| RN7SL432P | 0.854117 |
| RN7SL581P | -1.14738 |
| RNA5SP53  | 0.854826 |
| RNASE9    | -0.09789 |
| RNU1-75P  | -0.51289 |
| SAA3P     | 0.462747 |
| SLC25A11  | -0.39191 |
| STXBP5L   | 0.008379 |
| TBCC      | 0.709829 |
| TBCK      | -0.46125 |
| ZIC1      | 0.077023 |
| ZPBP2     | 1.18368  |

---

**Supplementary Table 2. The multivariate Cox regression coefficients of the genes in the 21-mRNA metastasis-related prognostic model.**

| <b>Gene name</b> | <b>Coefficient</b> |
|------------------|--------------------|
| AK7              | 0.003188           |
| ARHGEF40         | -0.81575           |
| FABP4            | 0.220511           |
| FAM81A           | 0.262222           |
| GPR126           | 0.0707             |
| ICT1             | -0.0832            |
| IDI2             | 0.887522           |
| LRRC45           | 0.913915           |
| LUZP4            | 0.160284           |
| MEIS2            | 0.274243           |
| OR2W1            | 0.888631           |
| PPIL1            | -0.62113           |
| PSMG3            | 0.348928           |
| RN7SKP226        | 0.395319           |
| RNA5SP318        | -0.16243           |
| RNU4-13P         | 0.072429           |
| RNU5A-2P         | 0.495492           |
| SCN8A            | -0.06987           |
| SLC8B1           | 0.088436           |
| STXBP5L          | -0.20713           |
| TBCC             | 0.456662           |

**Supplementary Table 3. The repeat occurrence frequencies of the genes in the 47-mRNA metastasis-related prognostic model based on Lasso-penalized Cox regression.**

| <b>Gene name</b> | <b>Repeat occurrence frequency</b> |
|------------------|------------------------------------|
| NTHL1            | 616                                |
| SLC25A11         | 596                                |
| IDI2             | 586                                |
| ARHGEF40         | 509                                |
| MEIS2            | 440                                |
| ZPBP2            | 432                                |
| CCDC125          | 407                                |
| RN7SKP226        | 391                                |
| RNA5SP53         | 387                                |
| KCNAB3           | 372                                |
| HIST1H2AE        | 370                                |
| RN7SL581P        | 366                                |
| GPR126           | 355                                |
| FABP4            | 337                                |
| FAM81A           | 334                                |
| PSORS1C1         | 333                                |
| BACH2            | 303                                |
| GYG2             | 289                                |
| NUP210L          | 283                                |
| RN7SL187P        | 251                                |
| RNU1-75P         | 248                                |
| POLE3            | 247                                |
| ZIC1             | 235                                |
| AK7              | 211                                |
| SAA3P            | 208                                |
| ARSG             | 206                                |
| CAMKK1           | 205                                |
| EIF2B3           | 201                                |
| POLN             | 183                                |
| TBCC             | 179                                |
| MAGEB5           | 171                                |
| PAPPA2           | 165                                |
| CPB2             | 155                                |
| COPS7B           | 154                                |
| C9orf153         | 153                                |
| STXBP5L          | 152                                |
| GAGE1            | 142                                |
| MDN1             | 137                                |

---

|           |     |
|-----------|-----|
| POU1F1    | 137 |
| ARL1      | 121 |
| ICOS      | 118 |
| RN7SL432P | 115 |
| RNASE9    | 114 |
| IL22      | 111 |
| TBCK      | 109 |
| GSDMC     | 108 |
| GUCY2C    | 108 |

---

**Supplementary Table 4. The repeat occurrence frequencies of the genes in the 21-mRNA metastasis-related prognostic model based on RSF-VH.**

| <b>Gene name</b> | <b>Repeat occurrence frequency</b> |
|------------------|------------------------------------|
| ICT1             | 229                                |
| ARHGEF40         | 201                                |
| FABP4            | 164                                |
| RNA5SP318        | 151                                |
| IDI2             | 146                                |
| FAM81A           | 141                                |
| STXBP5L          | 133                                |
| LUZP4            | 127                                |
| SCN8A            | 120                                |
| TBCC             | 120                                |
| OR2W1            | 116                                |
| PSMG3            | 115                                |
| LRRC45           | 113                                |
| RNU5A-2P         | 109                                |
| AK7              | 108                                |
| RNU4-13P         | 107                                |
| SLC8B1           | 106                                |
| RN7SKP226        | 105                                |
| GPR126           | 104                                |
| PPIL1            | 104                                |
| MEIS2            | 102                                |

**Supplementary Table 5. Comparison of distribution of clinical characteristics between the discovery and validation set.**

| <b>Parameter</b>                 | <b>Discovery set (n= 303)</b> | <b>Validation set (n=129)</b> | <b>p-value</b> |
|----------------------------------|-------------------------------|-------------------------------|----------------|
| <b>Age</b> (mean (SD))           | 8.78 (7.74)                   | 10.30 (8.21)                  | 0.066          |
| <b>Gender</b> (n (%))            |                               |                               |                |
| Female                           | 100 (33.0)                    | 54 (41.9)                     | 0.099          |
| Male                             | 203 (67.0)                    | 75 (58.1)                     |                |
| <b>Histology</b> (n (%))         |                               |                               |                |
| Classic                          | 201 (66.3)                    | 91 (70.5)                     | 0.052          |
| Desmoplastic                     | 54 (17.8)                     | 15 (11.6)                     |                |
| LC/A                             | 42 (13.9)                     | 15 (11.6)                     |                |
| MBEN                             | 6 ( 2.0)                      | 8 ( 6.2)                      |                |
| <b>Metastatic status</b> (n (%)) |                               |                               |                |
| Non-metastatic                   | 214 (70.6)                    | 89 (69.0)                     | 0.822          |
| Metastatic                       | 89 (29.4)                     | 40 (31.0)                     |                |
| <b>Subgroup</b> (n (%))          |                               |                               |                |
| Group 3                          | 64 (21.1)                     | 17 (13.2)                     | 0.197          |
| Group 4                          | 129 (42.6)                    | 65 (50.4)                     |                |
| SHH                              | 87 (28.7)                     | 35 (27.1)                     |                |
| WNT                              | 23 ( 7.6)                     | 12 ( 9.3)                     |                |

Abbreviations: SD, standard deviation; LC/A, large cell/anaplastic; MBEN, medulloblastoma with extensive nodularity.
